# Supplementary material
Source: PubMed Central journal article supplement (PMC8453102)

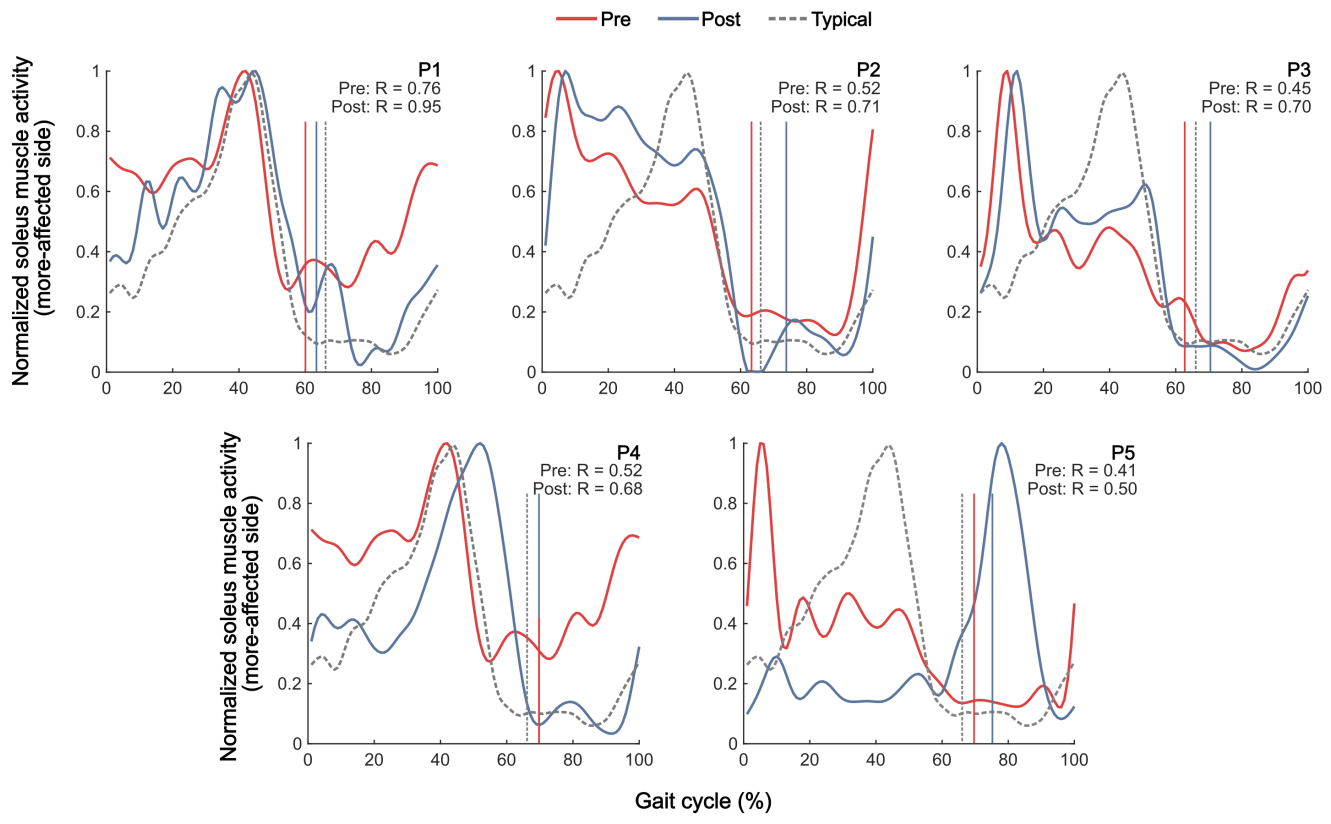

Supplement: NIHMS1731550-supplement-5.pdf [file NIHMS1731550-supplement-5.pdf]

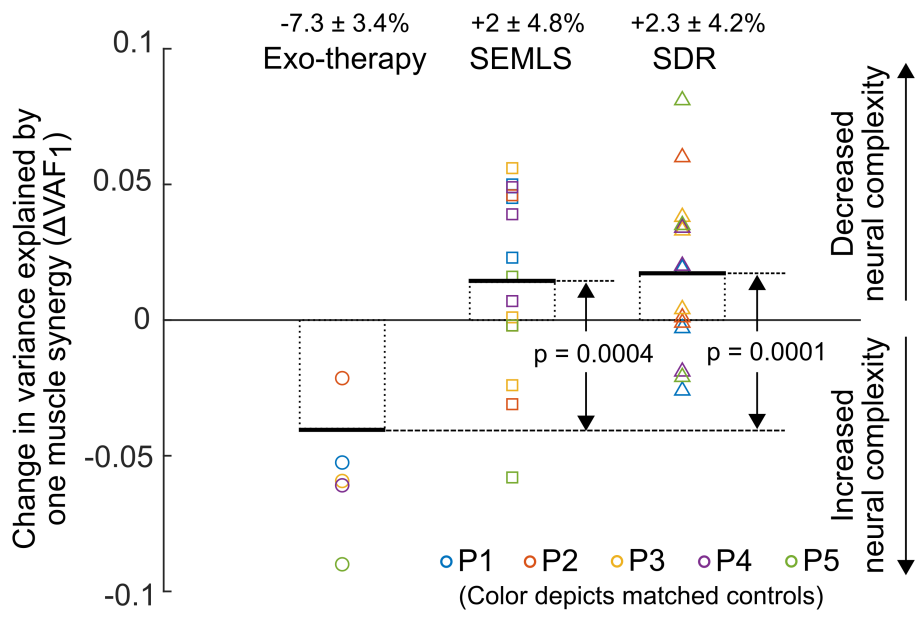

Supplement: NIHMS1731550-supplement-6.pdf [file NIHMS1731550-supplement-6.pdf]

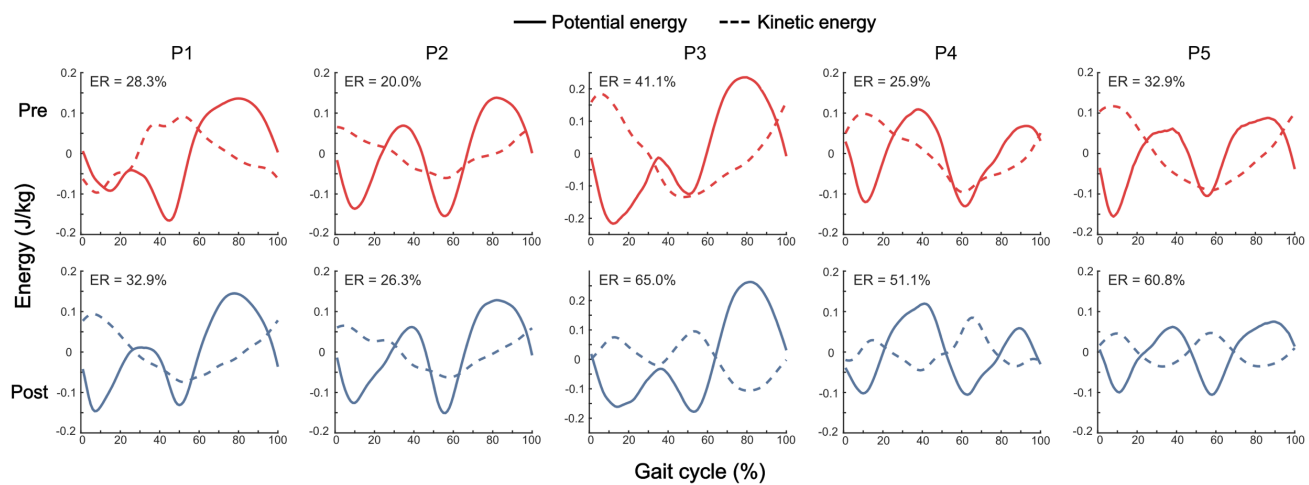

Supplement: NIHMS1731550-supplement-7.pdf [file NIHMS1731550-supplement-7.pdf]

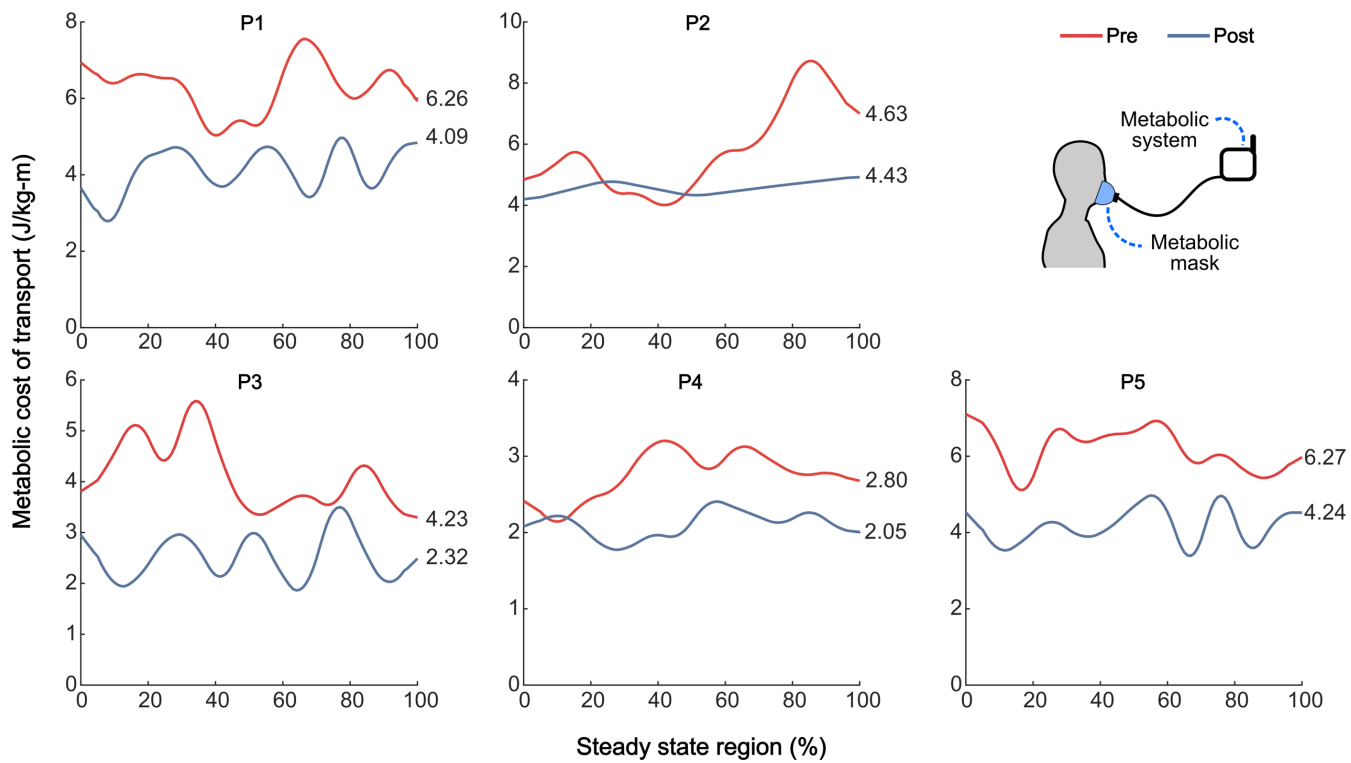

Supplement: NIHMS1731550-supplement-8.pdf [file NIHMS1731550-supplement-8.pdf]
